# Supplementary material
Source: Springer Nature journal article supplement (https://www.springermedizin.de/resource/supplementary/13024_2012_377_MOESM5_ESM.pdf/9643828)

# Additional File 5

**a**

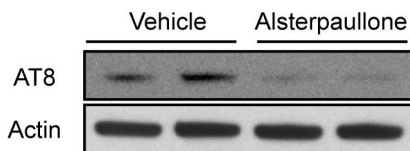

**b**

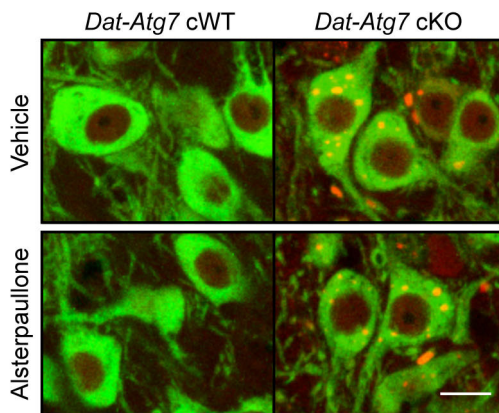

**c**

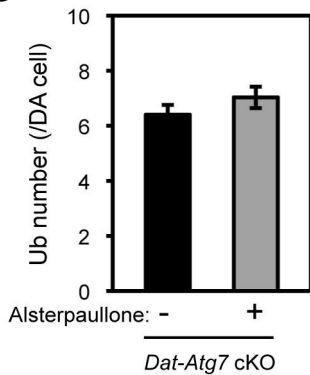

**d**

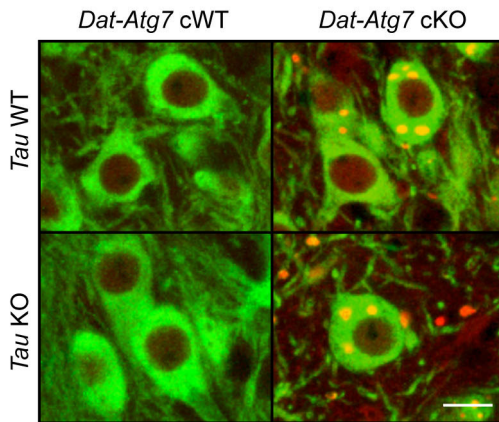

**e**

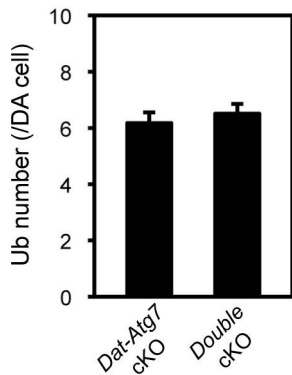

Supplement: MOESM5 [file 9643828]
